# Supplementary material
Source: publisher figshare collection journal article supplement (https://acs.figshare.com/ndownloader/files/12487235)
Supplement: Supplementary file 1 [file 12487235]

## Supporting Information

### **A Ratiometric Two-photon Fluorescent Probe for Detecting and Imaging Hypochlorite**

Yen Leng Pak<sup>†a</sup>, Sang Jun Park<sup>†b</sup>, Qingling Xu<sup>c</sup>, Hwan Myung Kim<sup>\*b</sup>, Juyoung Yoon<sup>\*a</sup>.

<sup>a</sup>Department of Chemistry and Nano Science, Ewha Womans University, Seoul 120-750, Korea

<sup>b</sup>Department of Chemistry and Energy System Research, Ajou University.

<sup>c</sup>School of Chemical Sciences, University of Chinese Academy of Sciences, Beijing 100049, P. R. China

\* E-mail: [kimhm@ajou.ac.kr](mailto:kimhm@ajou.ac.kr). Phone: +82 (031) 219-2609

\* E-mail: [jyoon@ewha.ac.kr](mailto:jyoon@ewha.ac.kr). Phone: +82 (02) 3277-2400

#### Table of Content

**Figure S1.** UV-Vis absorption of **B6S** (10  $\mu$ M) in presence of  $\text{OCl}^-$  (0-100  $\mu$ M) at 25  $^{\circ}\text{C}$  with 5% of DMF.

**Figure S2.** Ratiometric calibration curve of the **B6S** probe in the presence of  $\text{OCl}^-$ , plotting with the fluorescence intensity ratio ( $F_{482}/F_{378}$ ) against the  $\text{OCl}^-$  concentration ( $\lambda_{\text{ex}} = 355$  nm; RT, 5:95 DMF-Aq. PBS, 10 mM, pH 7.4).

**Figure S3.** Time-dependence spectra in the fluorescent intensity at 495 nm of **B6S** probe (10  $\mu$ M) in the absence and presence of  $\text{OCl}^-$  (50 and 100  $\mu$ M) for 60 min. ( $\lambda_{\text{ex}} = 355$  nm; RT, 5:95 DMF-Aq. PBS, 10 mM, pH 7.4, slits:3/5 nm).

**Figure S4.** The Detection limit of **B6S** with  $\text{OCl}^-$ .

**Figure S5.** Mass spectrum after 10  $\mu$ M of **B6S** probe reacted with 100  $\mu$ M of  $\text{OCl}^-$ .

**Figure S6.** UV-vis (up) and fluorescence (bottom) spectra of the probe **B6S** (10  $\mu$ M) in the before and after the addition of  $\text{OCl}^-$  (100  $\mu$ M), superimposed with the spectra of **B6** compound.

**Figure S7.** HeLa cells were incubated with each concentration of **B6S** probe for 24 hr. Cell viability was assayed by MTT test. Results are expressed as mean  $\pm$  standard deviation of three independent experiments.

**Figure S8.** Two-photon action spectra of **B6S** in PBS buffer (10 mM, pH 7.4).

**Figure S9.** Pseudocolored ratiometric TPM images of Raw 264.7 cells labeled with **B6S** (5 mM) for 30 min. (a) Control image. (b-e) Cells pretreated with NaOCl (50, 100, 200 and 500  $\mu$ M) for 30 min and then incubated with **B6S**. (f) Average  $F_{\text{green}}/F_{\text{blue}}$  intensity ratios in the TPM images. Images were acquired using 730 nm excitation and emission windows of 380-

430 nm (blue) and 480-600 nm (green). Scale bars = 25  $\mu$ m.

**Figure S10.**  $^1\text{H}$  NMR spectrum of **B6** compound.

**Figure S11.**  $^{13}\text{C}$  NMR spectrum of **B6** compound.

**Figure S12.** FAB spectrum of **B6** compound.

**Figure S13.**  $^1\text{H}$  NMR spectrum of **B6S** compound.

**Figure S14.**  $^{13}\text{C}$  NMR spectrum of **B6S** compound.

**Figure S15.** ESI-MS spectrum of **B6S** compound in DMSO.

## Additional Figures

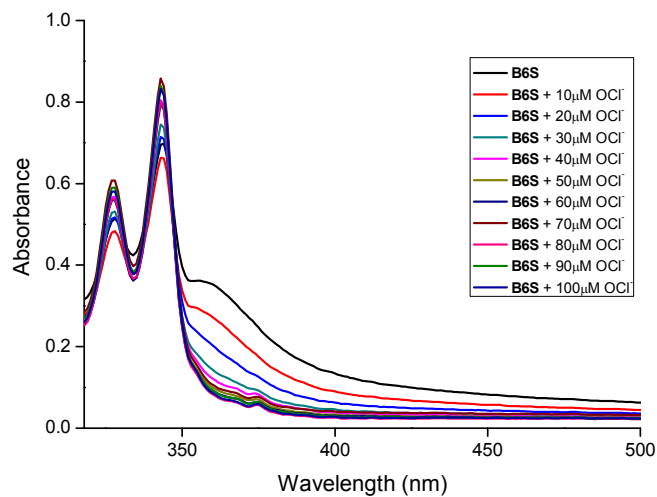

**Figure S1.** UV-Vis absorption of **B6S** (10  $\mu\text{M}$ ) in presence of  $\text{OCl}^-$  (0-100  $\mu\text{M}$ ) at 25  $^{\circ}\text{C}$  with 5% of DMF.

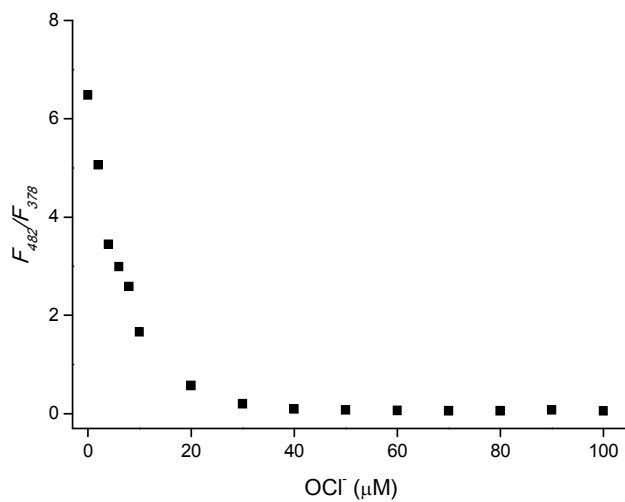

**Figure S2.** Ratiometric calibration curve of the **B6S** probe in the presence of  $\text{OCl}^-$ , plotting with the fluorescence intensity ratio ( $F_{482}/F_{378}$ ) against the  $\text{OCl}^-$  concentration ( $\lambda_{\text{ex}} = 355 \text{ nm}$ ; RT, 5:95 DMF-Aq. PBS, 10 mM, pH 7.4).

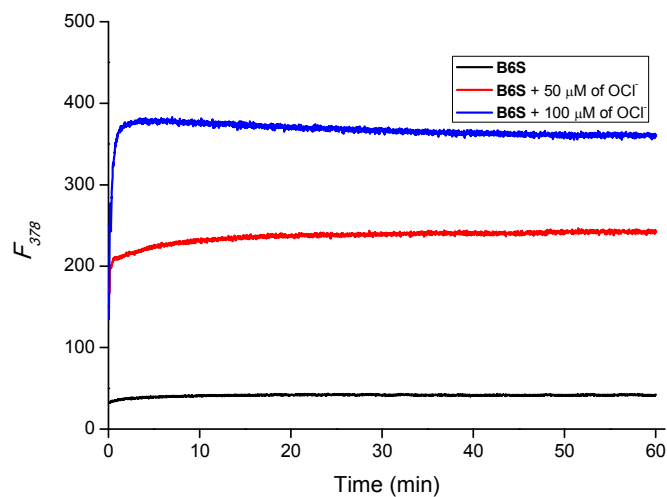

**Figure S3.** Time-dependence spectra in the fluorescent intensity at 495 nm of **B6S** probe (10  $\mu\text{M}$ ) in the absence and presence of  $\text{OCl}^-$  (50 and 100  $\mu\text{M}$ ) for 60 min. ( $\lambda_{\text{ex}} = 355 \text{ nm}$ ; RT, 5:95 DMF-Aq. PBS, 10 mM, pH 7.4, slits:3/5 nm).

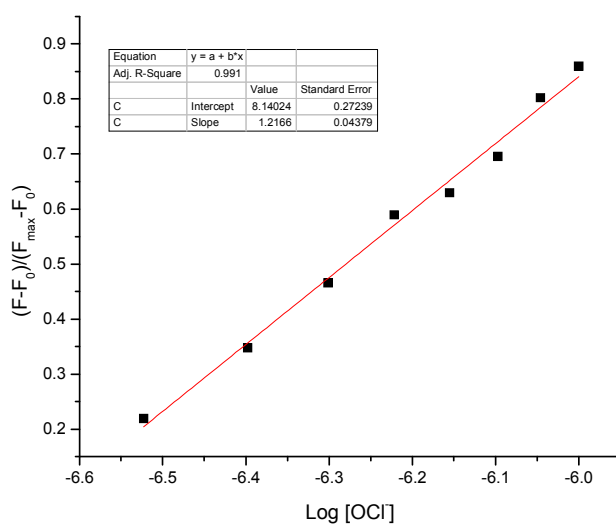

**Figure S4.** The Detection limit of **B6S** with  $\text{OCl}^-$ .

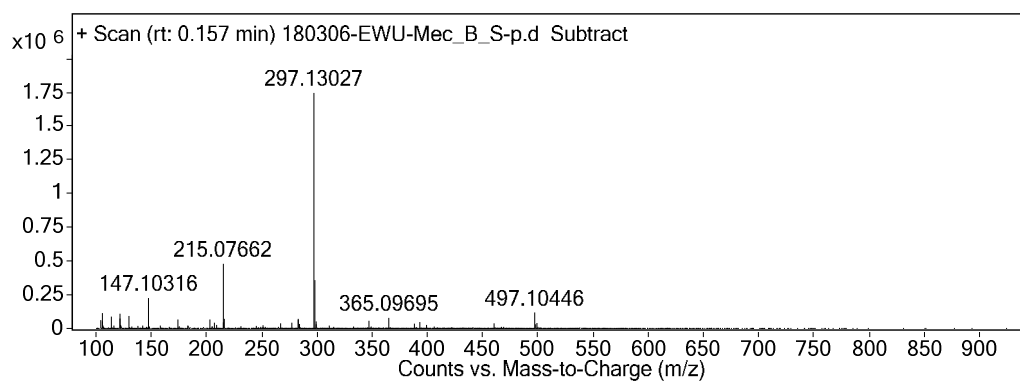

**Figure S5.** Mass spectrum after 10  $\mu\text{M}$  of **B6S** probe reacted with 100  $\mu\text{M}$  of  $\text{OCl}^-$ .

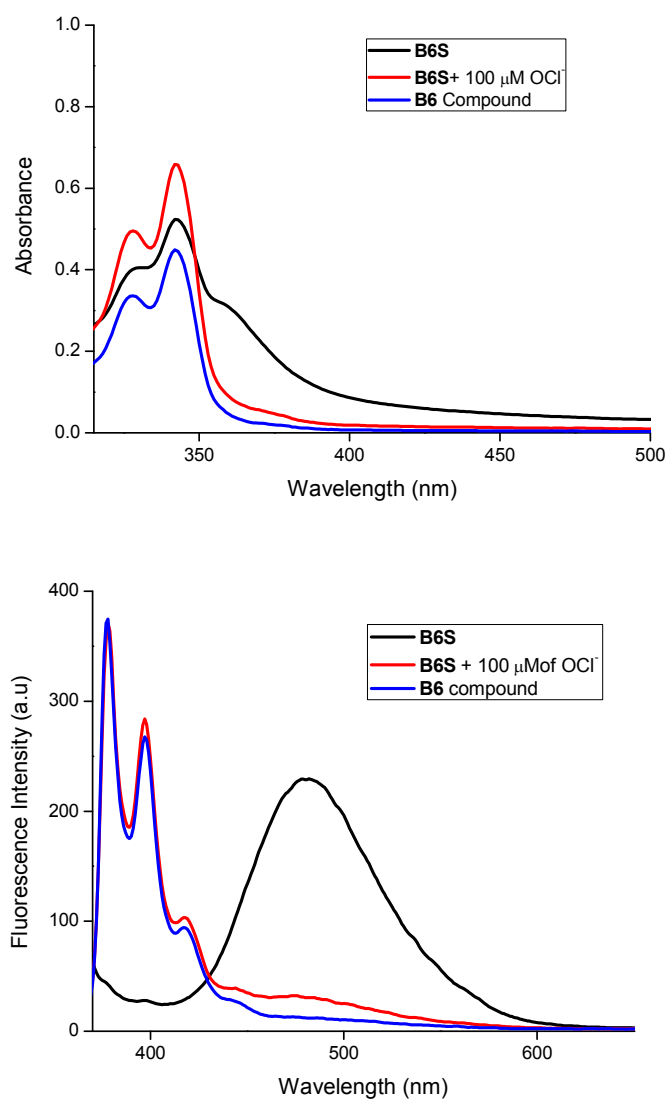

**Figure S6.** UV-vis (up) and fluorescence (bottom) spectra of the probe **B6S** (10  $\mu\text{M}$ ) before and after the addition of  $\text{OCl}^-$  (100  $\mu\text{M}$ ), superimposed with the spectra of **B6** compound.

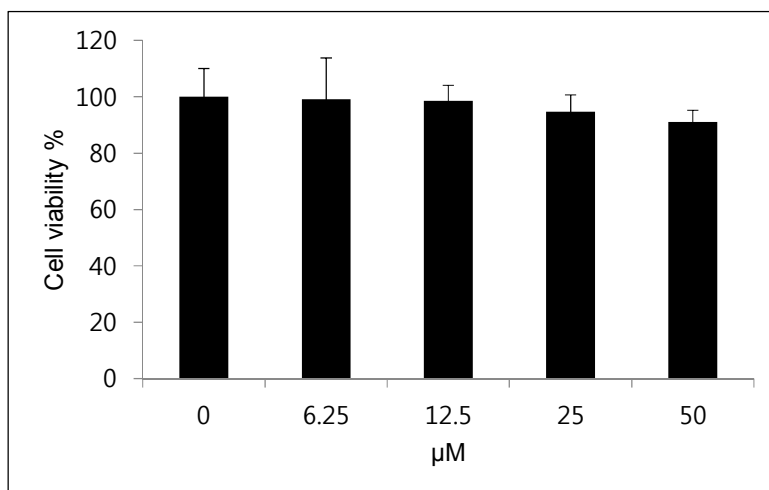

**Figure S7.** HeLa cells were incubated with each concentration of **B6S** probe for 24 hr. Cell viability was assayed by MTT test. Results are expressed as mean  $\pm$  standard deviation of three independent experiments.

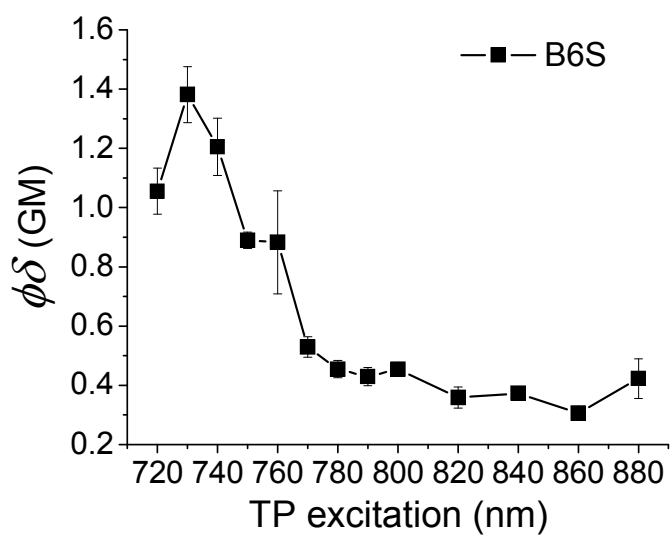

**Figure S8.** Two-photon action spectra of **B6S** in PBS buffer (10 mM, pH 7.4).

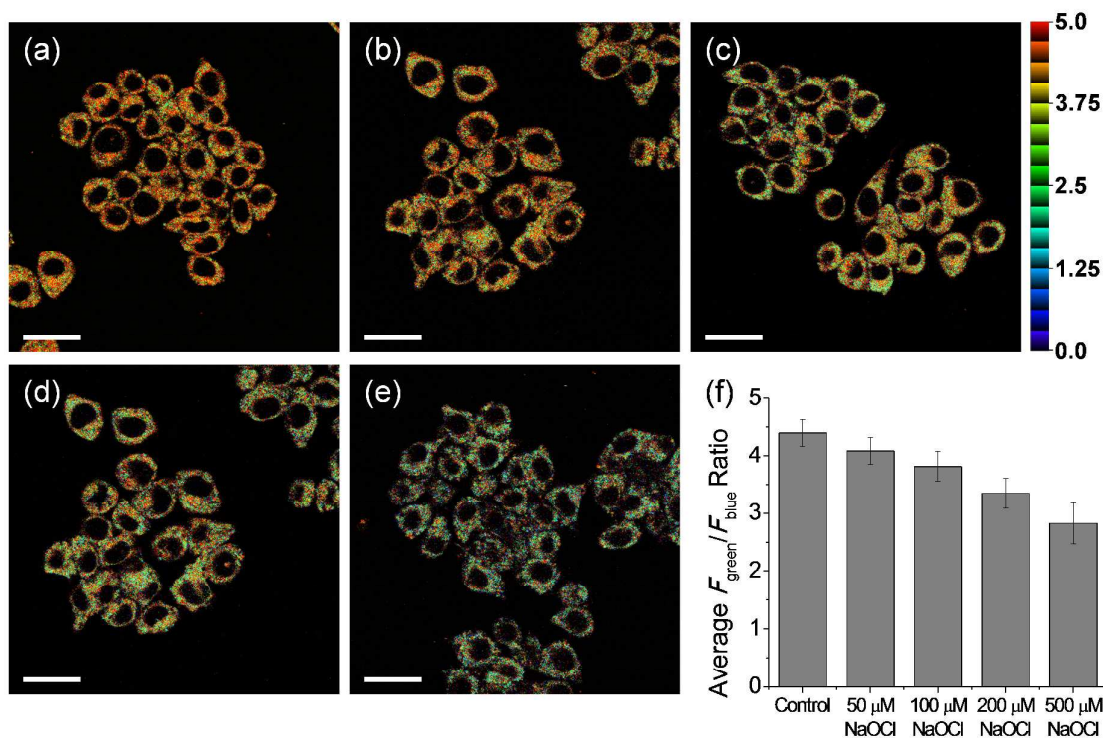

**Figure S9.** Pseudocolored ratiometric TPM images of Raw 264.7 cells labeled with **B6S** (5  $\mu\text{M}$ ) for 30 min. (a) Control image. (b–e) Cells pretreated with NaOCl (50, 100, 200 and 500  $\mu\text{M}$ ) for 30 min and then incubated with **B6S**. (f) Average  $F_{\text{green}}/F_{\text{blue}}$  intensity ratios in the TPM images. Images were acquired using 730 nm excitation and emission windows of 380–430 nm (blue) and 480–600 nm (green). Scale bars = 25  $\mu\text{m}$ .

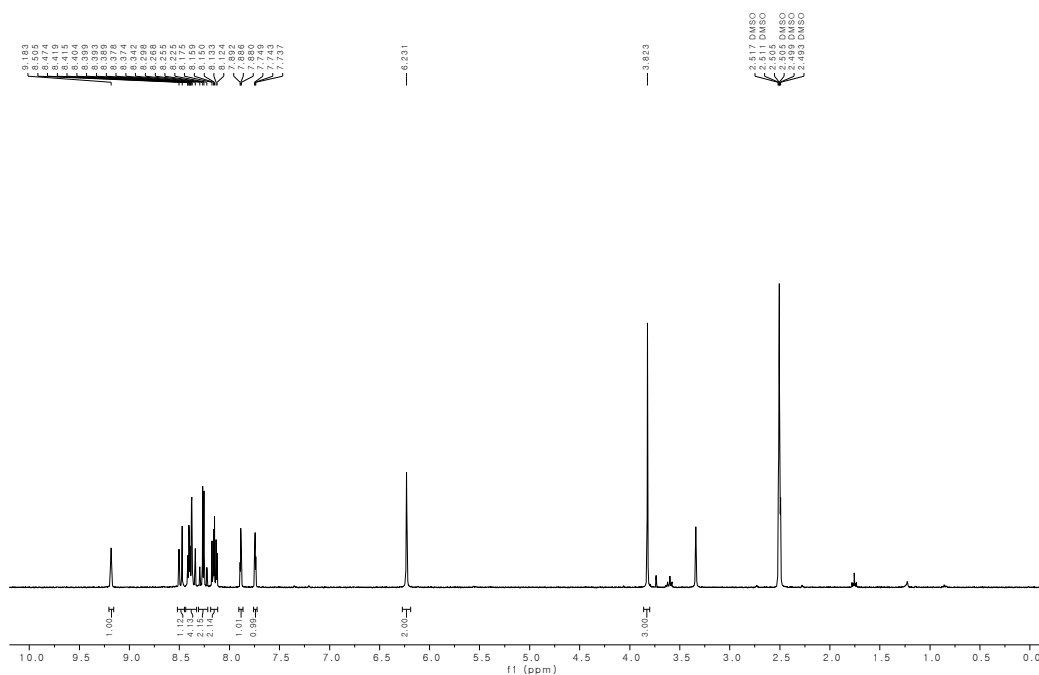

**Figure S10.**  $^1\text{H}$  NMR spectrum of **B6** compound.

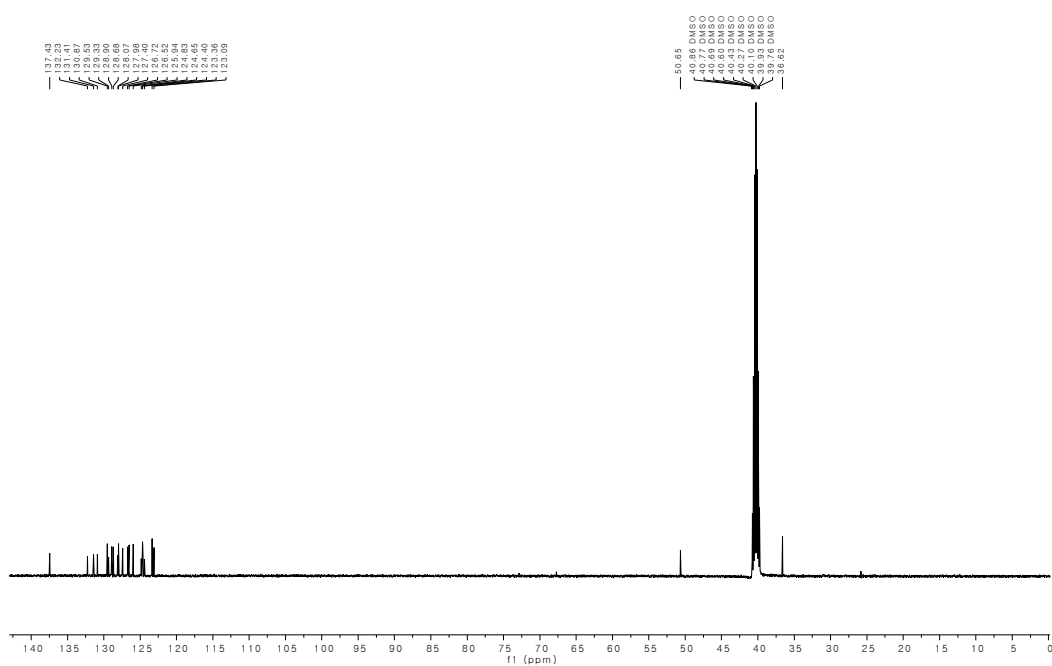

**Figure S11.**  $^{13}\text{C}$  NMR spectrum of **B6** compound.

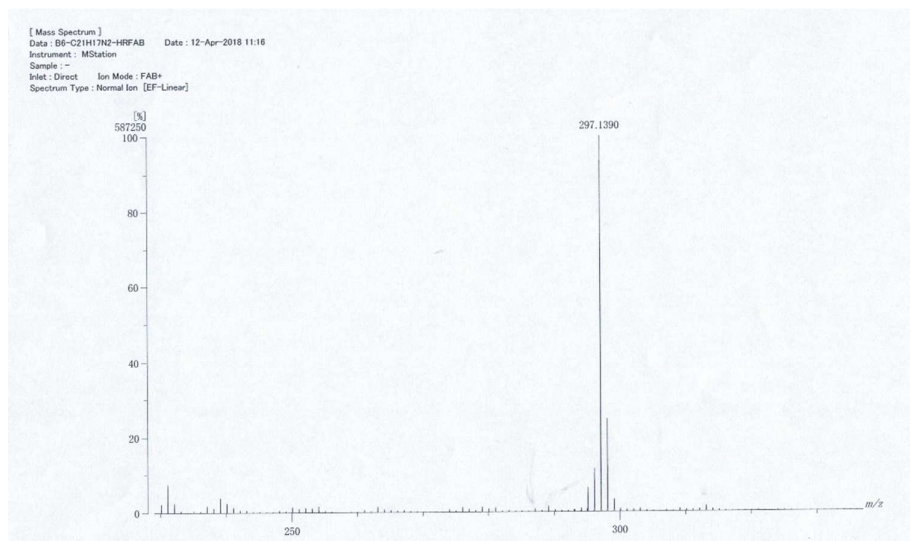

**Figure S12.** FAB spectrum of **B6** compound.



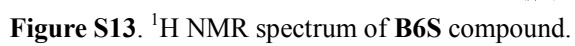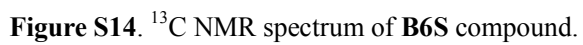

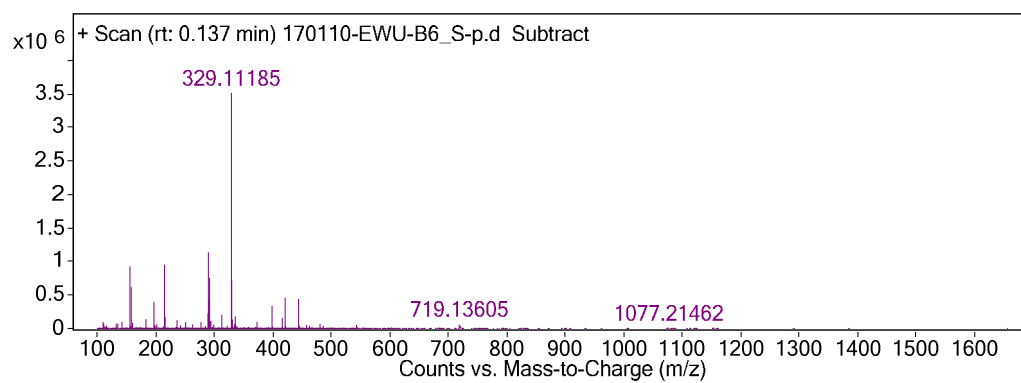

**Figure S15.** ESI-MS spectrum of **B6S** compound in DMSO.
